# Supplementary material for: N-Doped Biochar as a New Metal-Free Activator of Peroxymonosulfate for Singlet Oxygen-Dominated Catalytic Degradation of Acid Orange 7
Source: MDPI journal article supplement (doi:10.3390/nano11092288), 2021-09-02
Supplement: s1 [file s1]

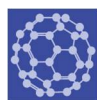

# N-Doped Biochar as a New Metal-Free Activator of Peroxymonosulfate for Singlet Oxygen-Dominated Catalytic Degradation of Acid Orange 7

Ruirui Han <sup>1</sup>, Yingsen Fang <sup>2</sup>, Ping Sun <sup>2</sup>, Kai Xie <sup>2,3</sup>, Zhicai Zhai <sup>2</sup>, Hongxia Liu <sup>1</sup> and Hui Liu <sup>2,\*</sup>

<sup>1</sup> College of Advanced Materials and Engineering, Jiaxing Nanhu University, Jiaxing 314001, China; hanrui@zjxu.edu.cn (R.H.); liuhongxia@zjxu.edu.cn (H.L.)

<sup>2</sup> College of Biological, Chemical Sciences and Engineering, Jiaxing University, Jiaxing 314001, China; fangyingsen@zjxu.edu.cn (Y.F.); sunping@zjxu.edu.cn (P.S.); xiekai2050956@163.com (K.X.); zhaizhikai@zjxu.edu.cn (Z.Z.)

<sup>3</sup> College of Petroleum Engineering, Liaoning Petrochemical University, Fushun, 113001, China

\* Correspondence: liuhui@zjxu.edu.cn; Tel.: +86-0573-8364-3695

**Table S1.** Surface porosity of various materials.

| samples  | SSA (m <sup>2</sup> /g) | Pore volume (cm <sup>3</sup> /g) | Pore size (nm) |
|----------|-------------------------|----------------------------------|----------------|
| RSBC800  | 428.53                  | 0.11                             | 3.99           |
| NRSBC700 | 333.65                  | 0.15                             | 2.91           |
| NRSBC800 | 471.12                  | 0.13                             | 3.30           |
| NRSBC900 | 514.31                  | 0.36                             | 2.94           |

**Table S2.** The chemical composition of various materials.

| samples            | C at. % | O at. % | N at. % | N distribution % |           |            |
|--------------------|---------|---------|---------|------------------|-----------|------------|
|                    |         |         |         | Pyridine-N       | Pyrrole-N | Graphene-N |
| RSBC800            | 82.98   | 14.47   | 2.55    | —                | —         | —          |
| NRSBC700           | 68.98   | 12.67   | 18.35   | 48.40            | 23.40     | 28.20      |
| NRSBC800           | 78.71   | 16.42   | 4.87    | 42.04            | 25.28     | 32.68      |
| NRSBC900           | 72.67   | 21.12   | 0.12    | 42.80            | 26.57     | 30.63      |
| reused<br>NRSBC800 | 68.19   | 26.92   | 4.89    | 31.85            | 26.39     | 41.76      |

**Table S3.** Quality parameters of water samples.

| Samples         | Turbidity (NTU) | UV254 (cm <sup>-1</sup> ) | pH   | Conductivity (μs/cm) |
|-----------------|-----------------|---------------------------|------|----------------------|
| Ultrapure Water | 0               | 0.005                     | 6.89 | 2.2                  |
| Deionized Water | 0               | 0.007                     | 7.01 | 8.1                  |
| Tap Water       | 0.031           | 0.103                     | 7.22 | 229                  |
| River Water     | 7.011           | 0.155                     | 7.56 | 538                  |

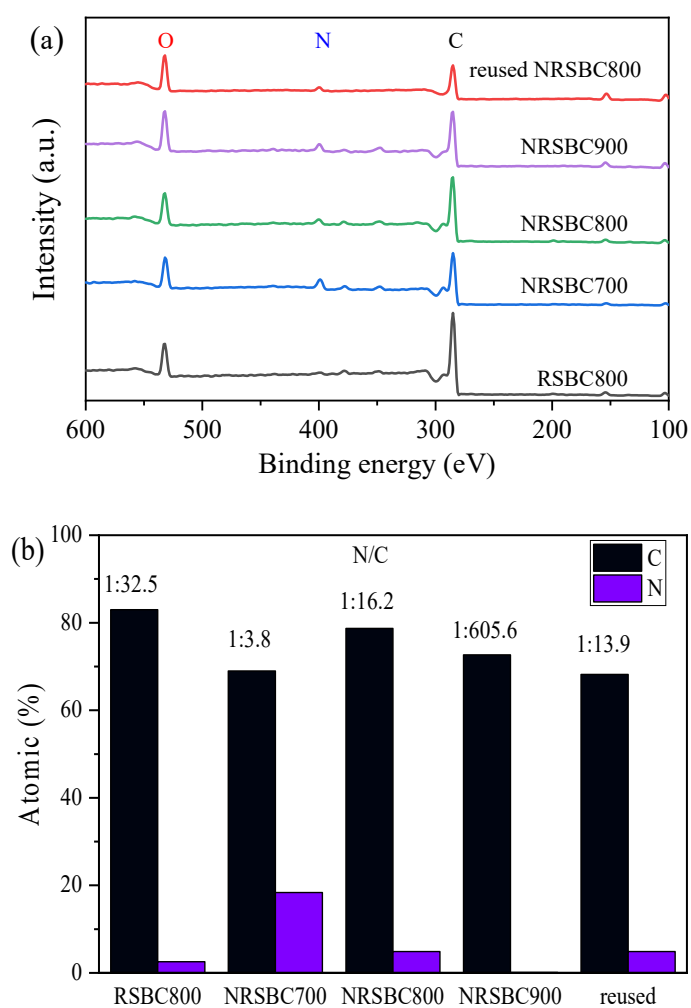

**Figure S1.** XPS survey spectra (a) and atomic% (b) of different materials (RSBC800, NRSBC700, NRSBC800, NRSBC900 and reused NRSBC800).

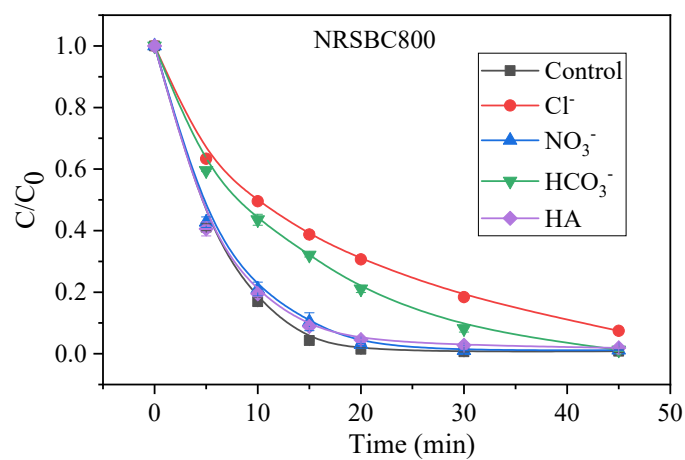

**Figure S2.** Effect of anions and humic acid (HA) on the removal of AO7. Condition: [AO7] = 50 mg/L, [catalyst] = 100 mg/L, [PMS] = 614 mg/L, [Anions] = 5 mM, [HA] = 10 mg/L and T = 25 °C.

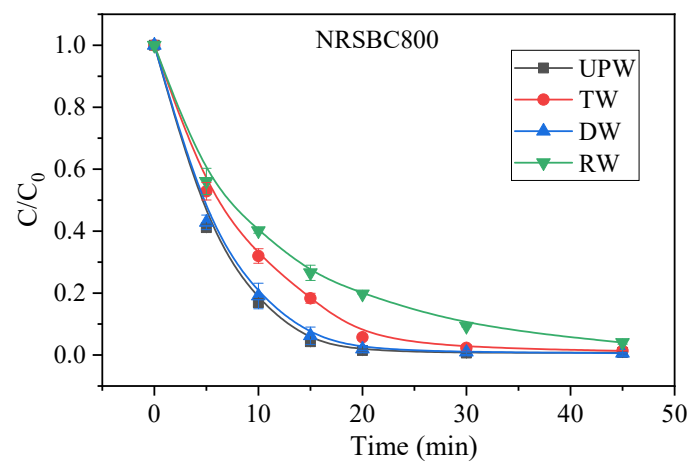

**Figure S3.** Effect of actual water matrices on the AO7 degradation. Condition: [AO7] = 50 mg/L, [catalyst] = 100 mg/L, [PMS] = 614 mg/L, and T = 25 °C. (Abbreviations: UPW–Ultrapure Water; TW–Tap Water; DW–Deionized Water; RW–River Water.).

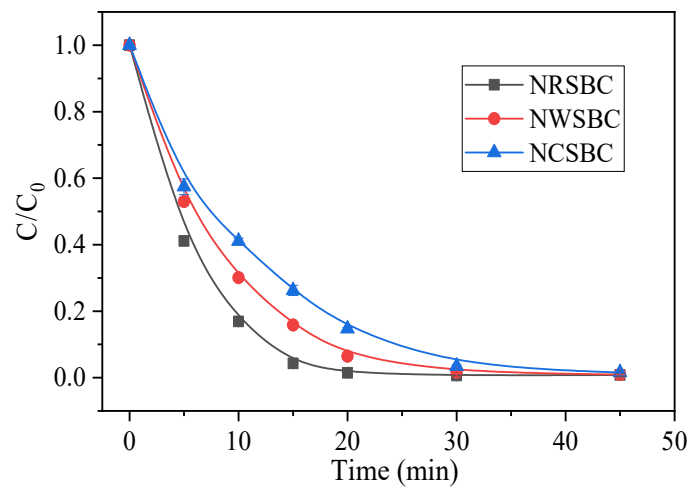

**Figure S4.** Degradation of the AO7 using different kinds of straw. Condition: [AO7] = 50 mg/L, [catalyst] = 100 mg/L, [PMS] = 614 mg/L, and T = 25 °C.
